# Supplementary material
Source: PubMed Central journal article supplement (PMC2817585)

**Table S1. Primer sequences for PCR analyses**

**SYBR GREEN RT PCR**

**Gene    Accession Number**

|               |              |                                                                                                  |
|---------------|--------------|--------------------------------------------------------------------------------------------------|
| <b>36B4</b>   | NM_007475    | for primer: GCA GAC AAC GTG GGC TCC AAG CAG AT<br>rev primer: GGT CCT CCT TGG TGA ACA CGA AGC CC |
| <b>Acacb</b>  | NP_598665    | for primer: CGC TCA CCA ACA GTA AGG TGG<br>rev primer: GCT TGG CAG GGA GTT CCT C                 |
| <b>Cidea</b>  | BC096649     | for primer: ACA GGA GGA CCC GCA CCA AT<br>rev primer: GCT GTG CCC TGG TTA CAT GAA C              |
| <b>Cideb</b>  | NM_009894    | for primer: CCA TCC CTC TGC ATG GAG TAC CTT TC<br>rev primer: CCT CCT GTG TCA CAT GGA ACC AG     |
| <b>Elovl6</b> | NP_569717    | for primer: CAG CCC ATC GTG AGT GAG G<br>rev primer: AGA TGC CGA CCA CCA AAG ATA                 |
| <b>Fsp27</b>  | NM_178373    | for primer: GGA GGT CCA ACA CAA TCC AAC TG<br>rev primer: GGG TCT TCA TTG CAG CAT CTT C          |
| <b>Gpam</b>   | NP_032175    | for primer: ACA GTT GGC ACA ATA GAC GTT T<br>rev primer: CCT TCC ATT TCA GTG TTG CAG A           |
| <b>Plin1</b>  | NM_175640    | for primer: GGG ACC TGT GAG TGC TTC C<br>rev primer: GTA TTG AAG AGC CGG GAT CTT TT              |
| <b>Plin2</b>  | NM_007408    | for primer: GTG GAA AGG ACC AAG TCT GTG<br>rev primer: GAC TCC AGC CGT TCA TAG TTG               |
| <b>Plin3</b>  | NM_007408    | for primer: TGT CCA GTG CTT ACA ACT CGG<br>rev primer: CAG GGC ACA GGT AGT CAC AC                |
| <b>Plin4</b>  | NM_020568    | for primer: TCC TGC TCT GAG GGA CCC TT<br>rev primer: TCT TGC CTT TGG ATT TGG GG                 |
| <b>Plin5</b>  | NM_025874    | for primer: TGT CCA GTG CTT ACA ACT CGG<br>rev primer: CAG GGC ACA GGT AGT CAC AC                |
| <b>Pparg</b>  | NM_001127330 | for primer: CCA GAG CAT GGT GCC TTC GCT<br>rev primer: CAG CAA CCA TTG GGT CAG CTC               |

**Scd1** NP\_033153

for primer: GAT AGA GCA AGT CCC CGT TG

rev primer: CCT GCA TTA ACC CCC TTC AC

**SREBP1** NM\_011480

for primer: GGC ACT AAG TGC CCT CAA CCT

rev primer: GCC ACA TAG ATC TCT GCC AGT GT

**ChIP PCR**

**Cidea promoter**

for primer: TCT GTG AGC TTG GAG GCC AGA CT

rev primer: AGA GCC CCC AGC GCT CTG AT

**Acadm exon**

for primer: CAG AGA AGA AGG GTG ACG AGT A

rev primer: TAG CGG GTA CTT TAG GAT CTG G

# Supplemental Figure 1

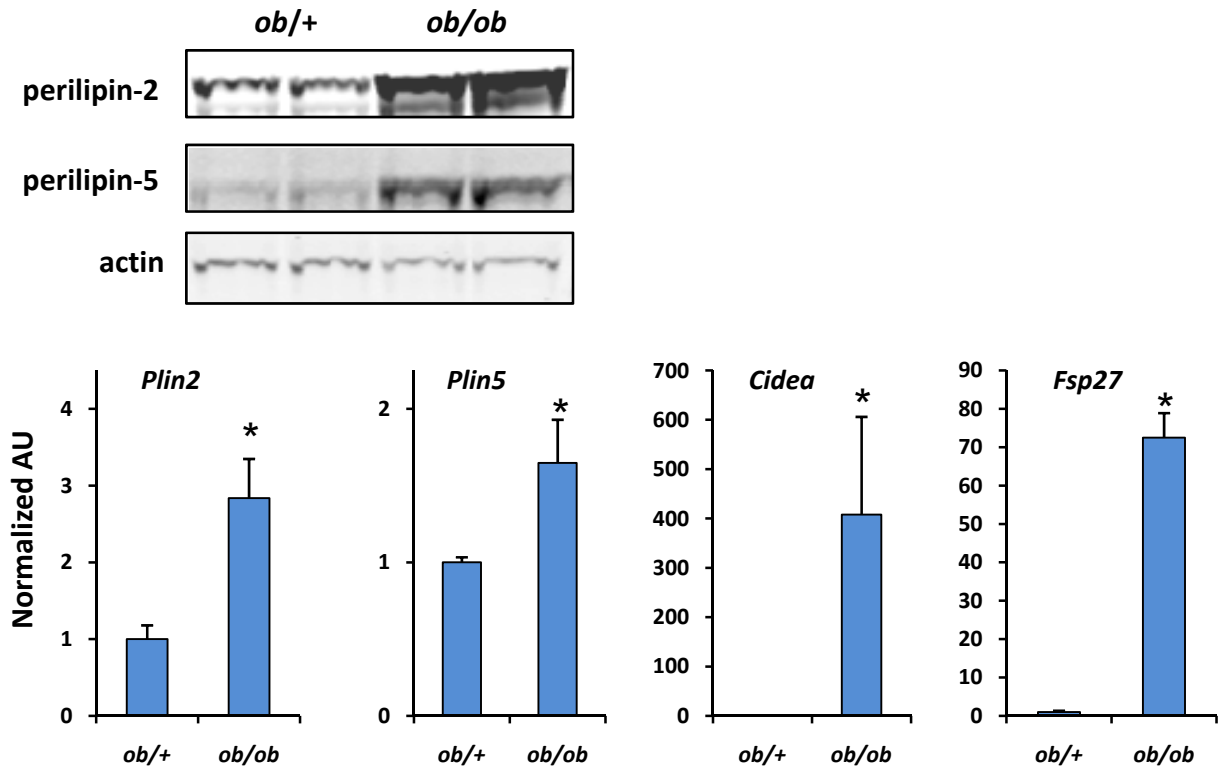

Supplement: supp_M000976_jlr.M000976-1.pdf [file supp_M000976_jlr.M000976-1.pdf]
